# Supplementary material for: Multivesicular bodies mediate long-range retrograde NGF-TrkA signaling
Source: eLife journal article supplement (doi:10.7554/elife.33012), 2018-01-30
Supplement: supp [file elife-33012-supp-v1.zip]

Archive with 11 entries (11 files):
- elife_poa_e33012_Transparent_Reporting_File.pdf
- elife_poa_e33012_Figure_5_figure_supplement_1.pdf
- elife_poa_e33012_Video_3.mp4
- elife_poa_e33012_Video_2.mp4
- elife_poa_e33012_Figure_2_figure_supplement_1.pdf
- elife_poa_e33012_Figure_1_figure_supplement_1.pdf
- elife_poa_e33012_Figure_4_figure_supplement_1.pdf
- elife_poa_e33012_Figure_7_figure_supplement_1.pdf
- elife_poa_e33012_Video_1.mp4
- elife_poa_e33012_Figure_6_figure_supplement_1.pdf
- elife_poa_e33012_Figure_3_figure_supplement_1.pdf
