# Supplementary material for: Multivesicular bodies mediate long-range retrograde NGF-TrkA signaling
Source: eLife journal article supplement (doi:10.7554/elife.33012), 2018-01-30
Supplement: supp [file elife-33012-supp-v1.zip › elife_poa_e33012_Figure_1_figure_supplement_1.pdf]

**a** Flag-TrkA Endosome Transport Assay

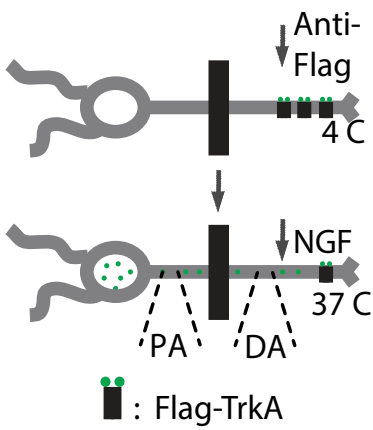

**b**

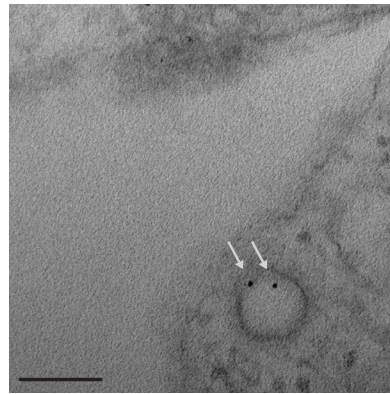

**c**

Distal Axons

Proximal Axons

Time after NGF application

30 min

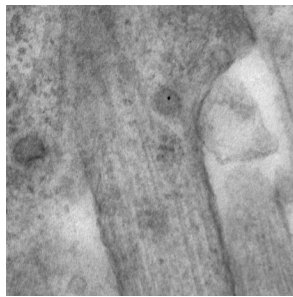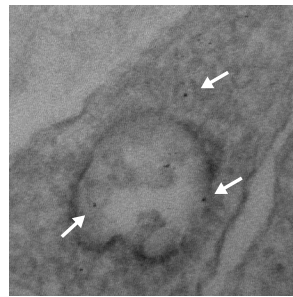

No Flag Signal

1 hr

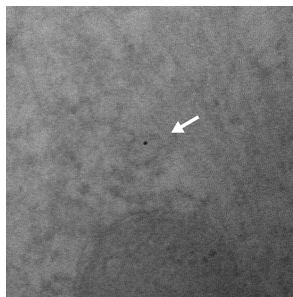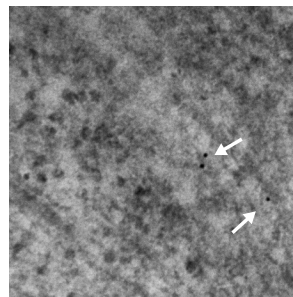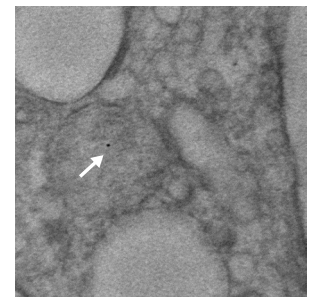

3 hr

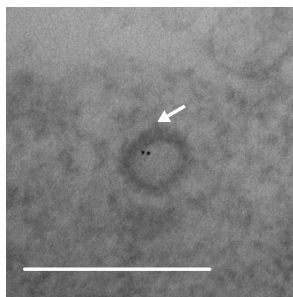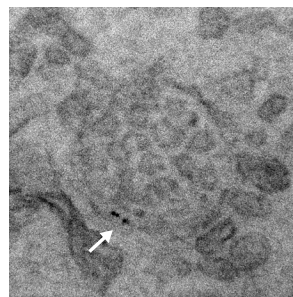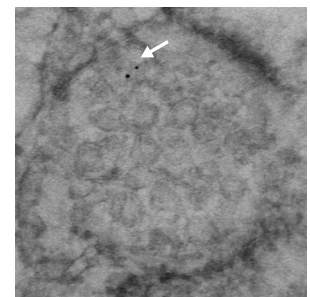

Figure 1-figure supplement 1
