# Supplementary figures and images for: Multivesicular bodies mediate long-range retrograde NGF-TrkA signaling
Source: eLife journal article supplement (doi:10.7554/elife.33012), 2018-01-30

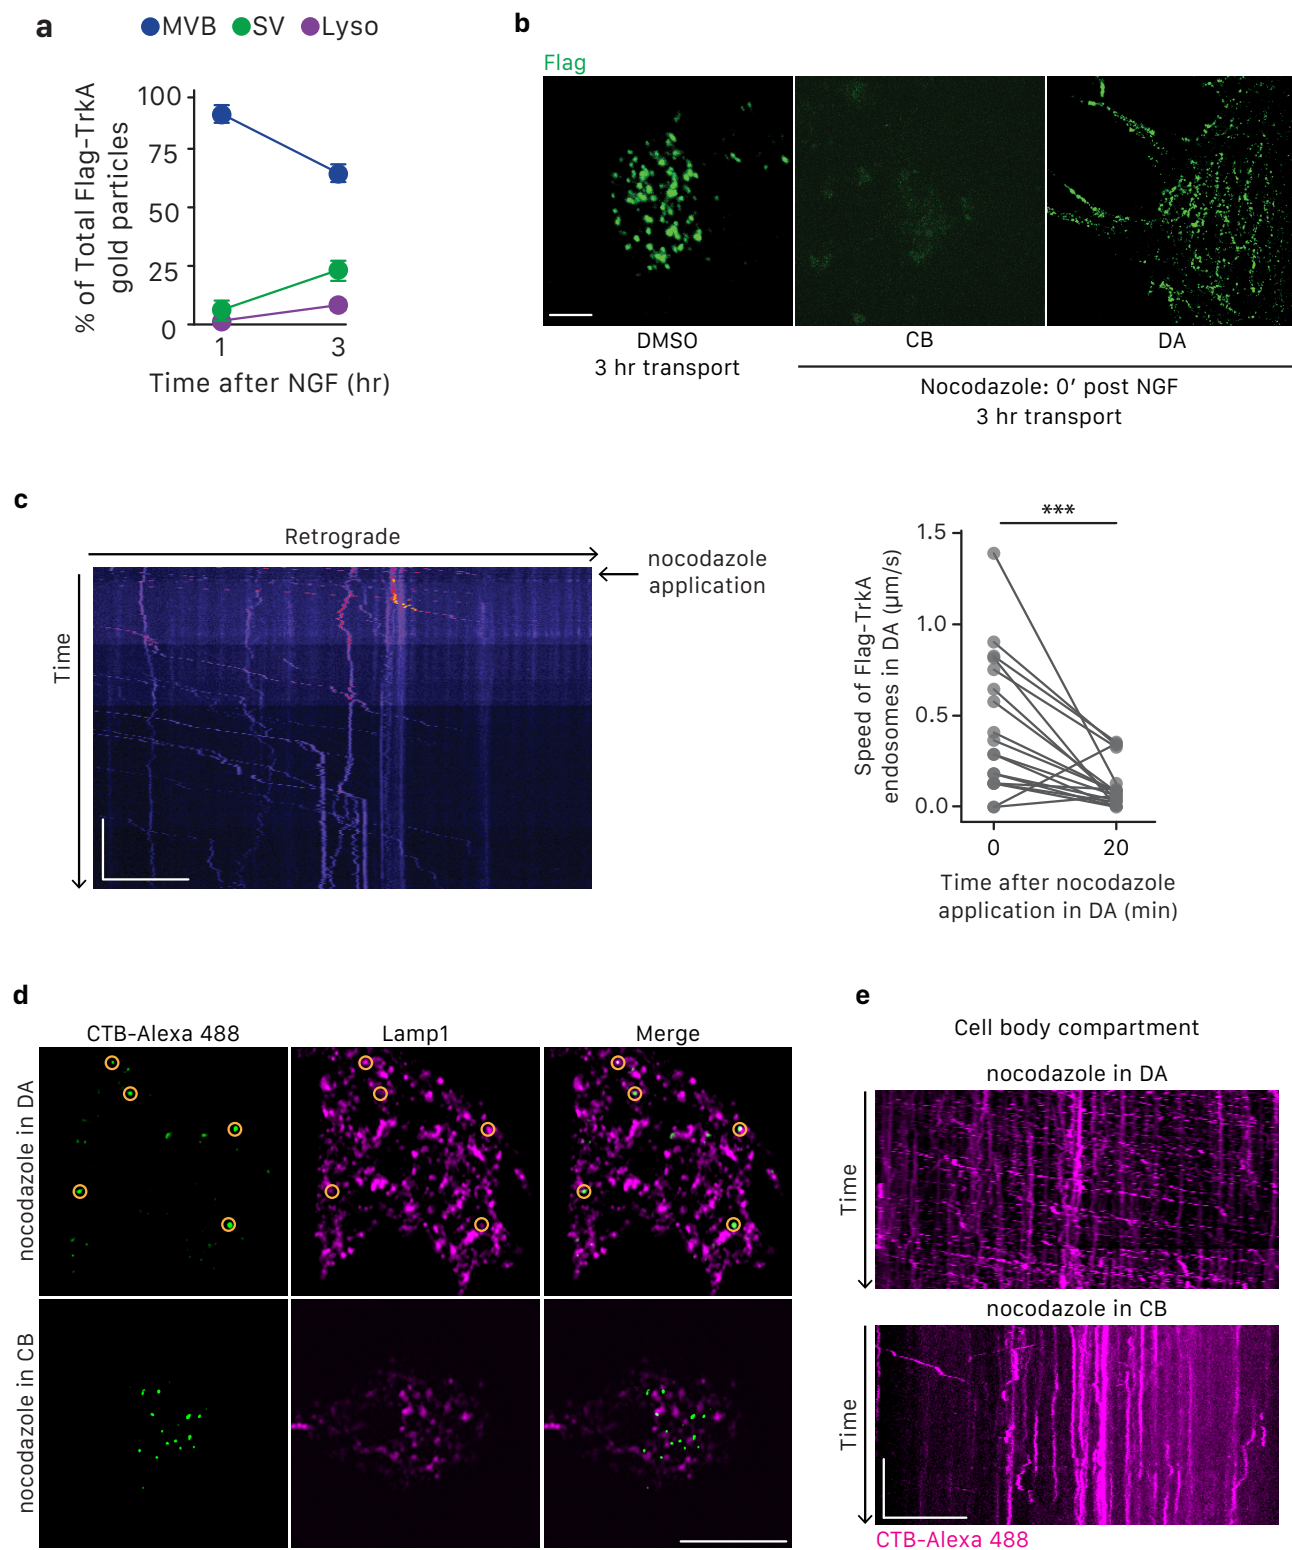

Figure 5-figure supplement 1

Supplement: supp [file elife-33012-supp-v1.zip › elife_poa_e33012_Figure_5_figure_supplement_1.pdf]

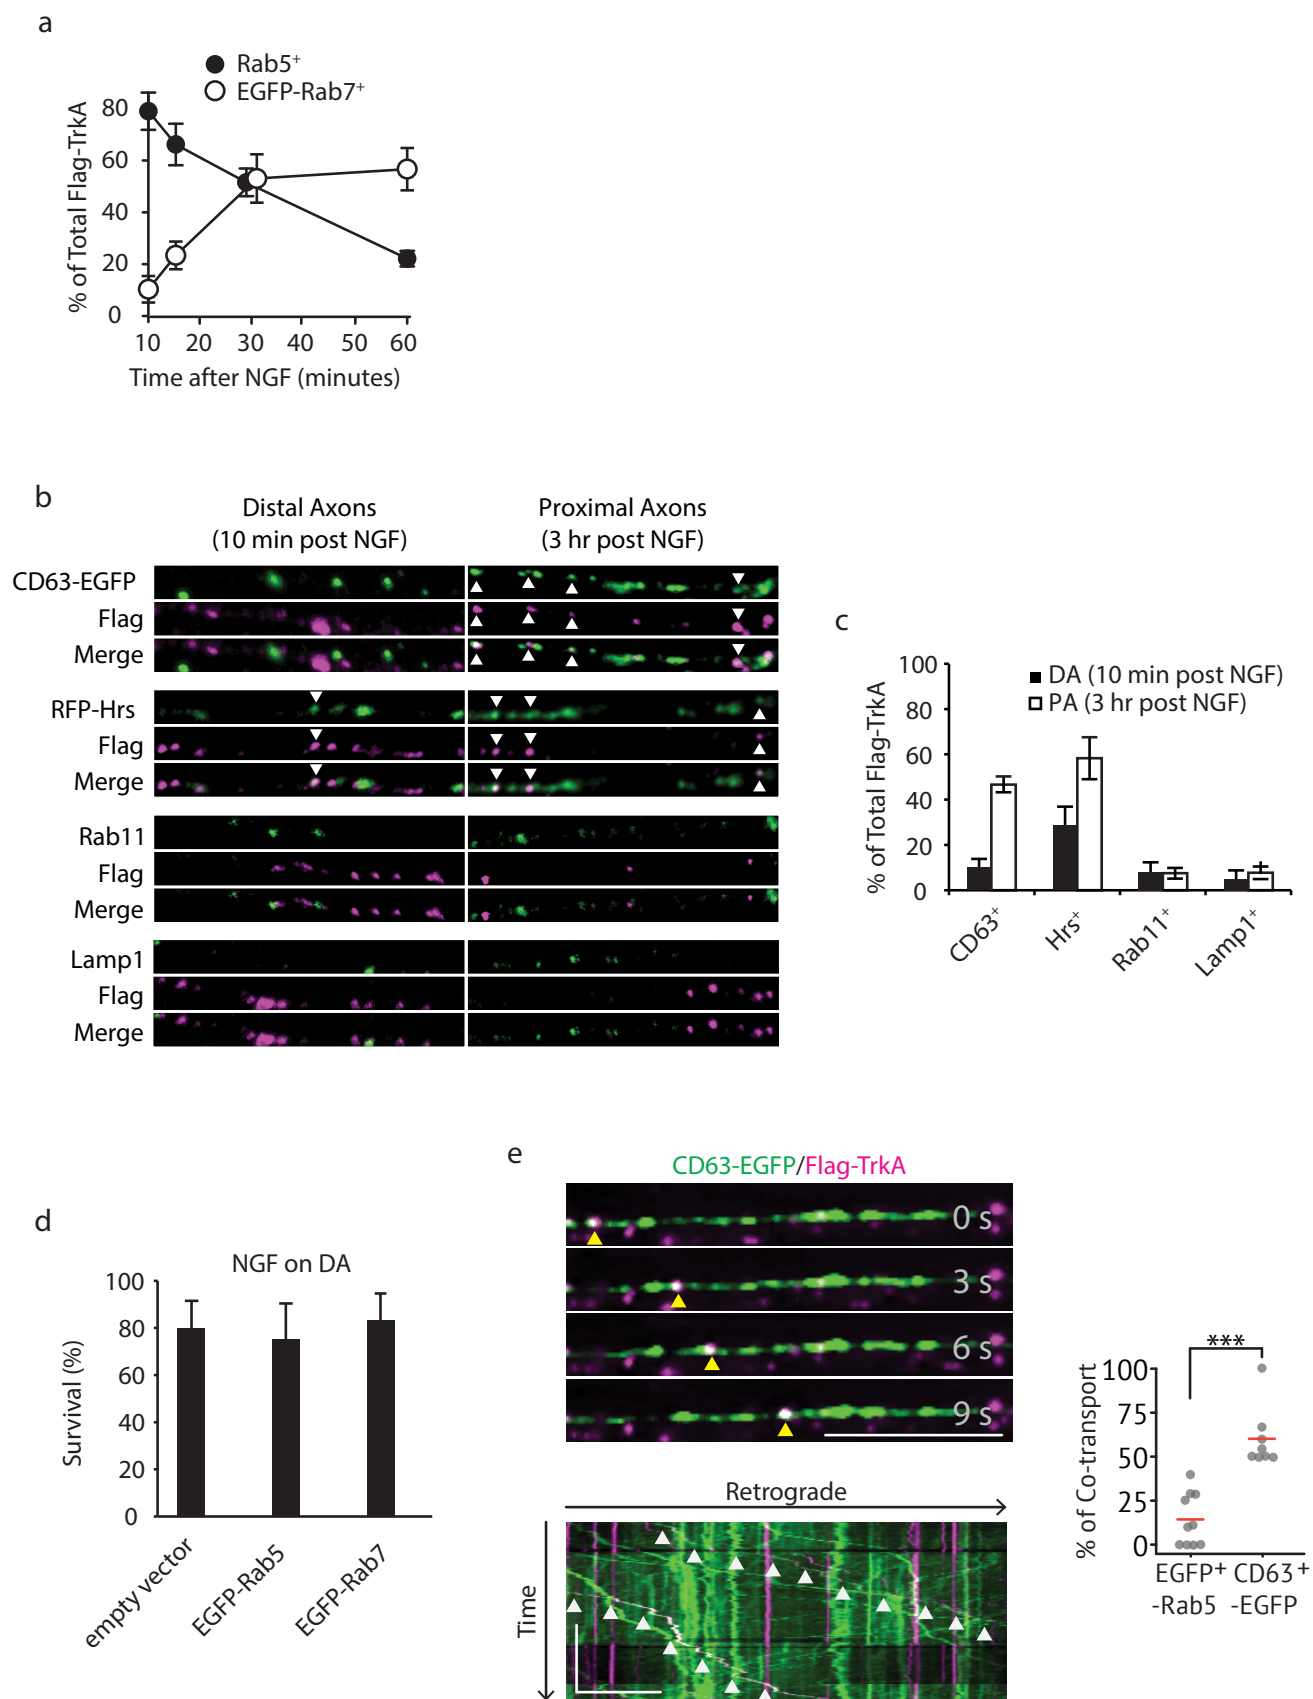

Figure 2-figure supplement 1

Supplement: supp [file elife-33012-supp-v1.zip › elife_poa_e33012_Figure_2_figure_supplement_1.pdf]

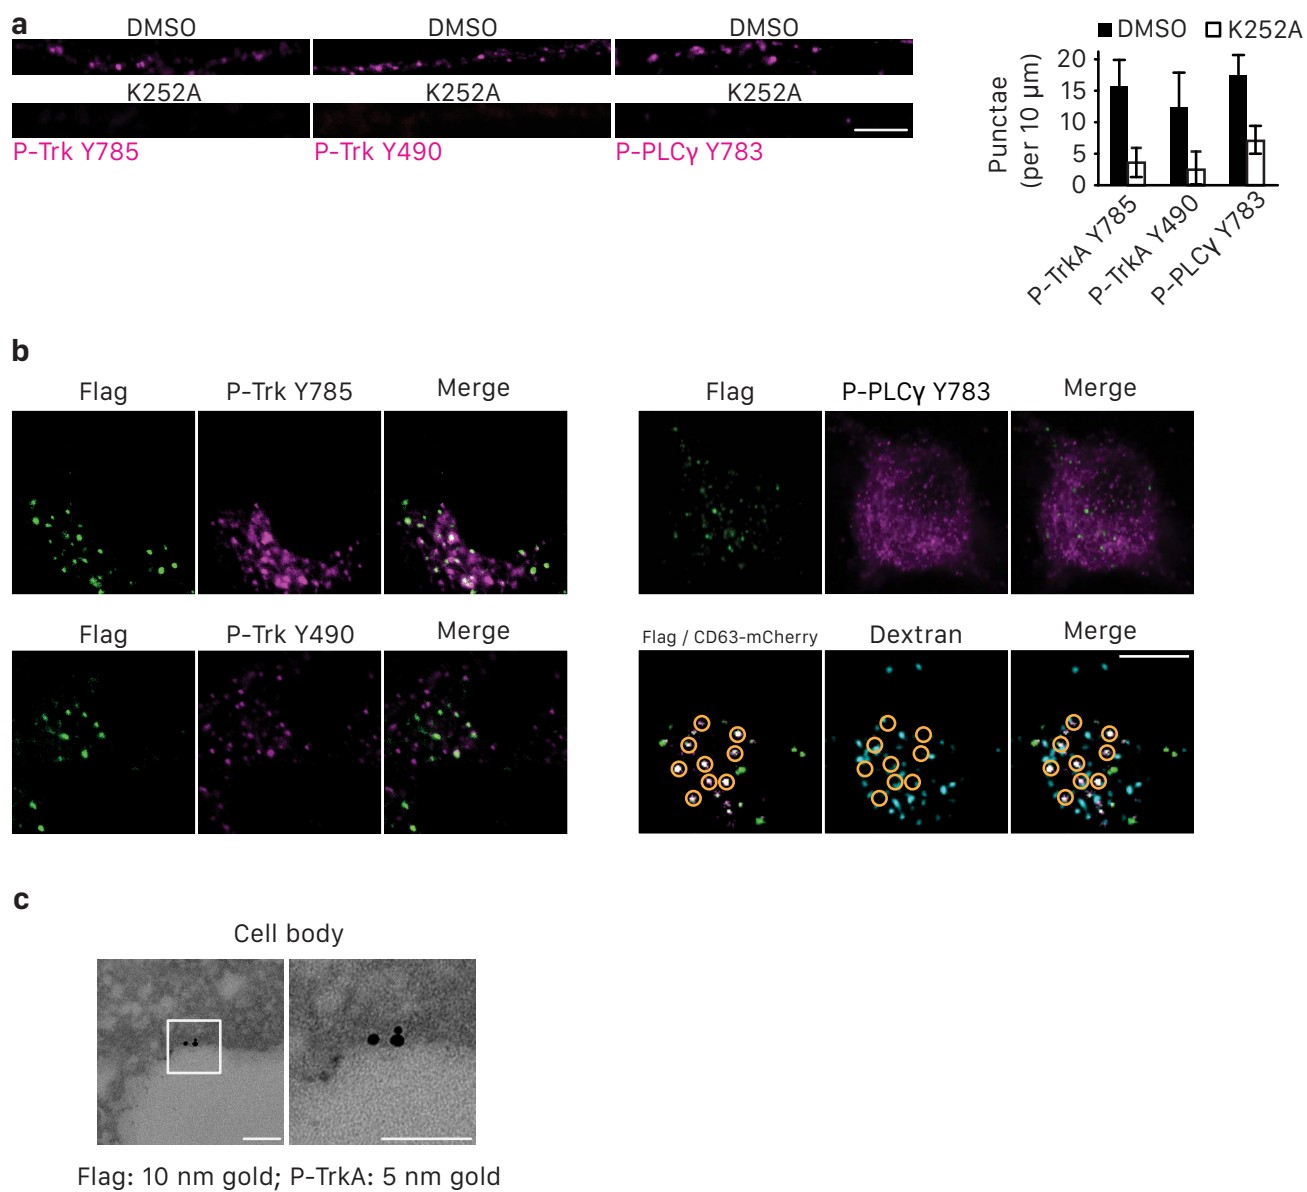

Figure 4-figure supplement 1

Supplement: supp [file elife-33012-supp-v1.zip › elife_poa_e33012_Figure_4_figure_supplement_1.pdf]

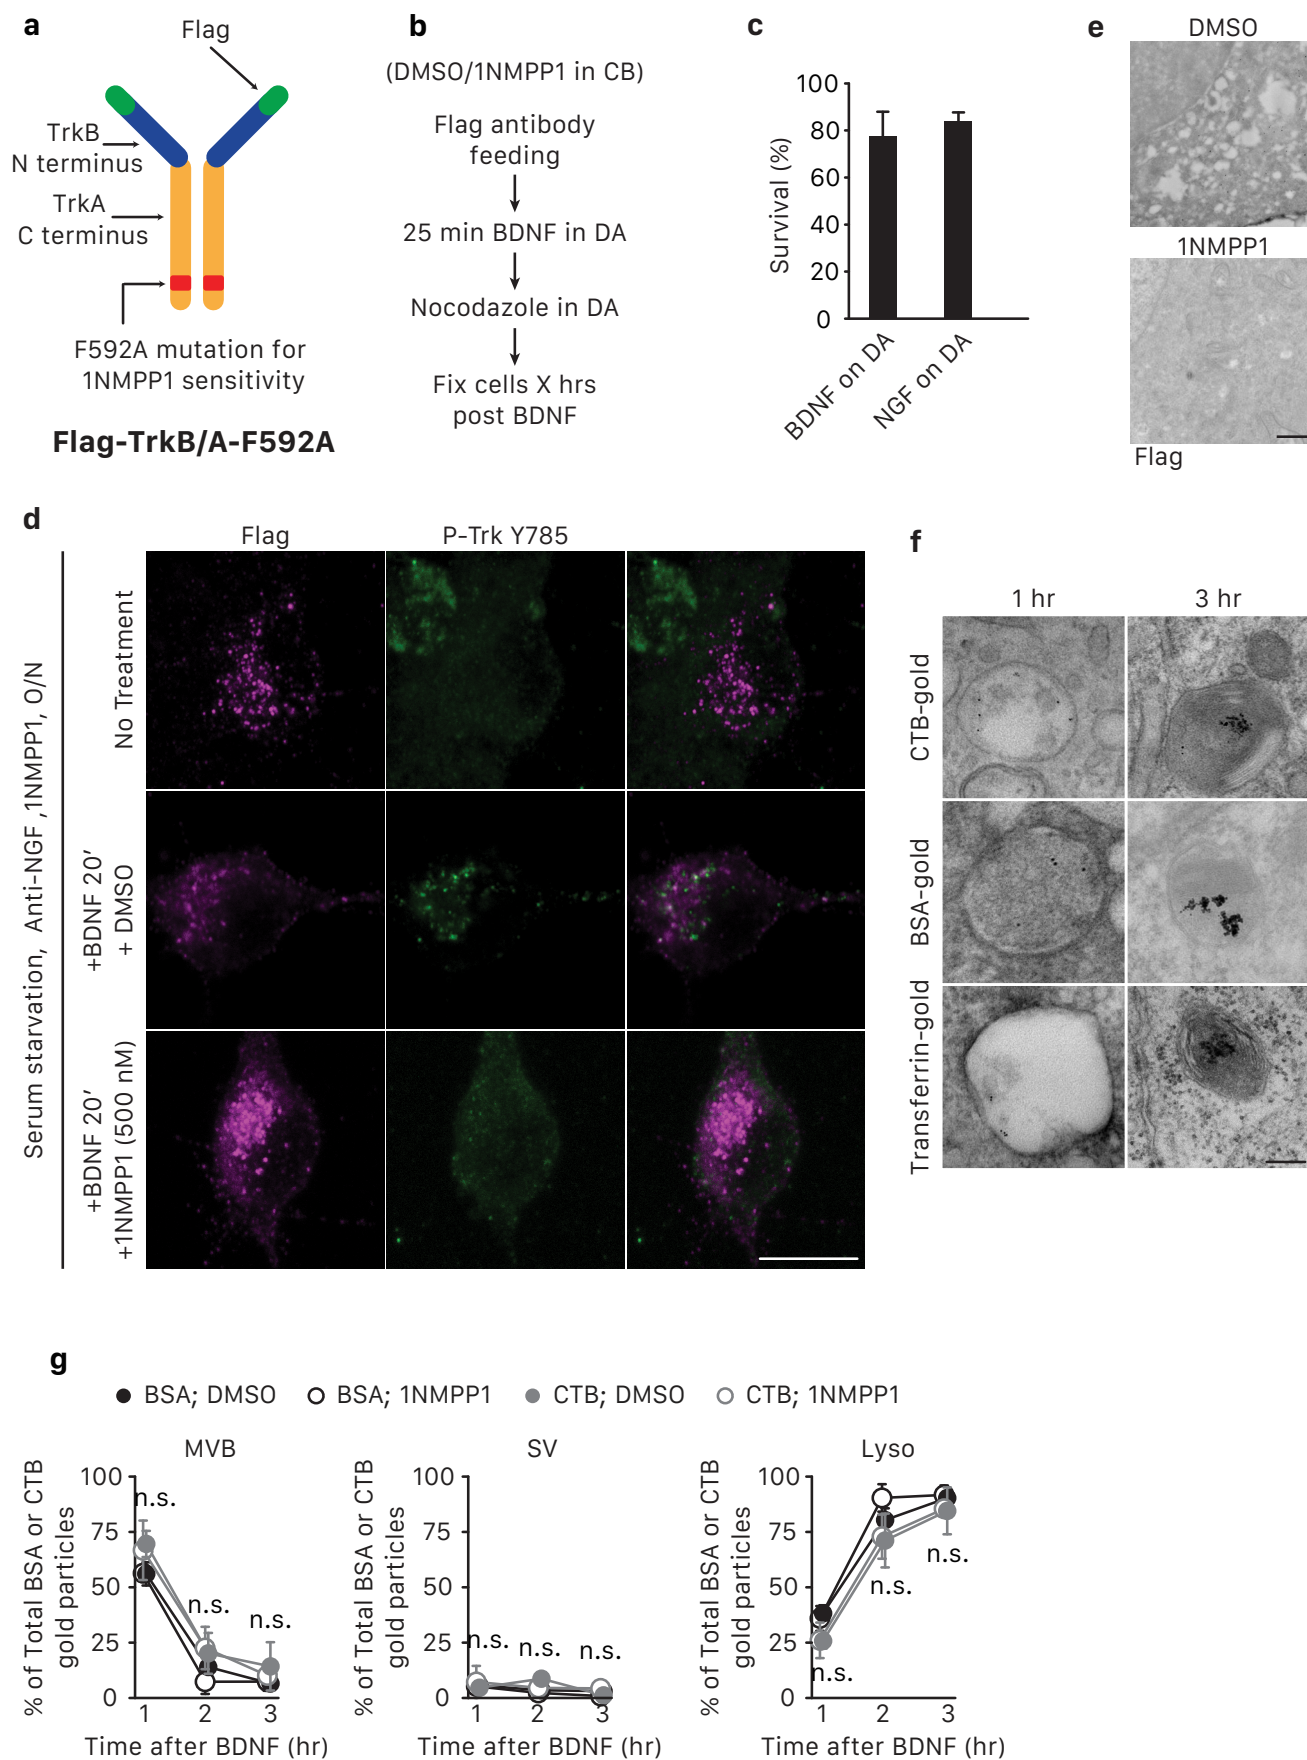

Figure 7-figure supplement 1

Supplement: supp [file elife-33012-supp-v1.zip › elife_poa_e33012_Figure_7_figure_supplement_1.pdf]

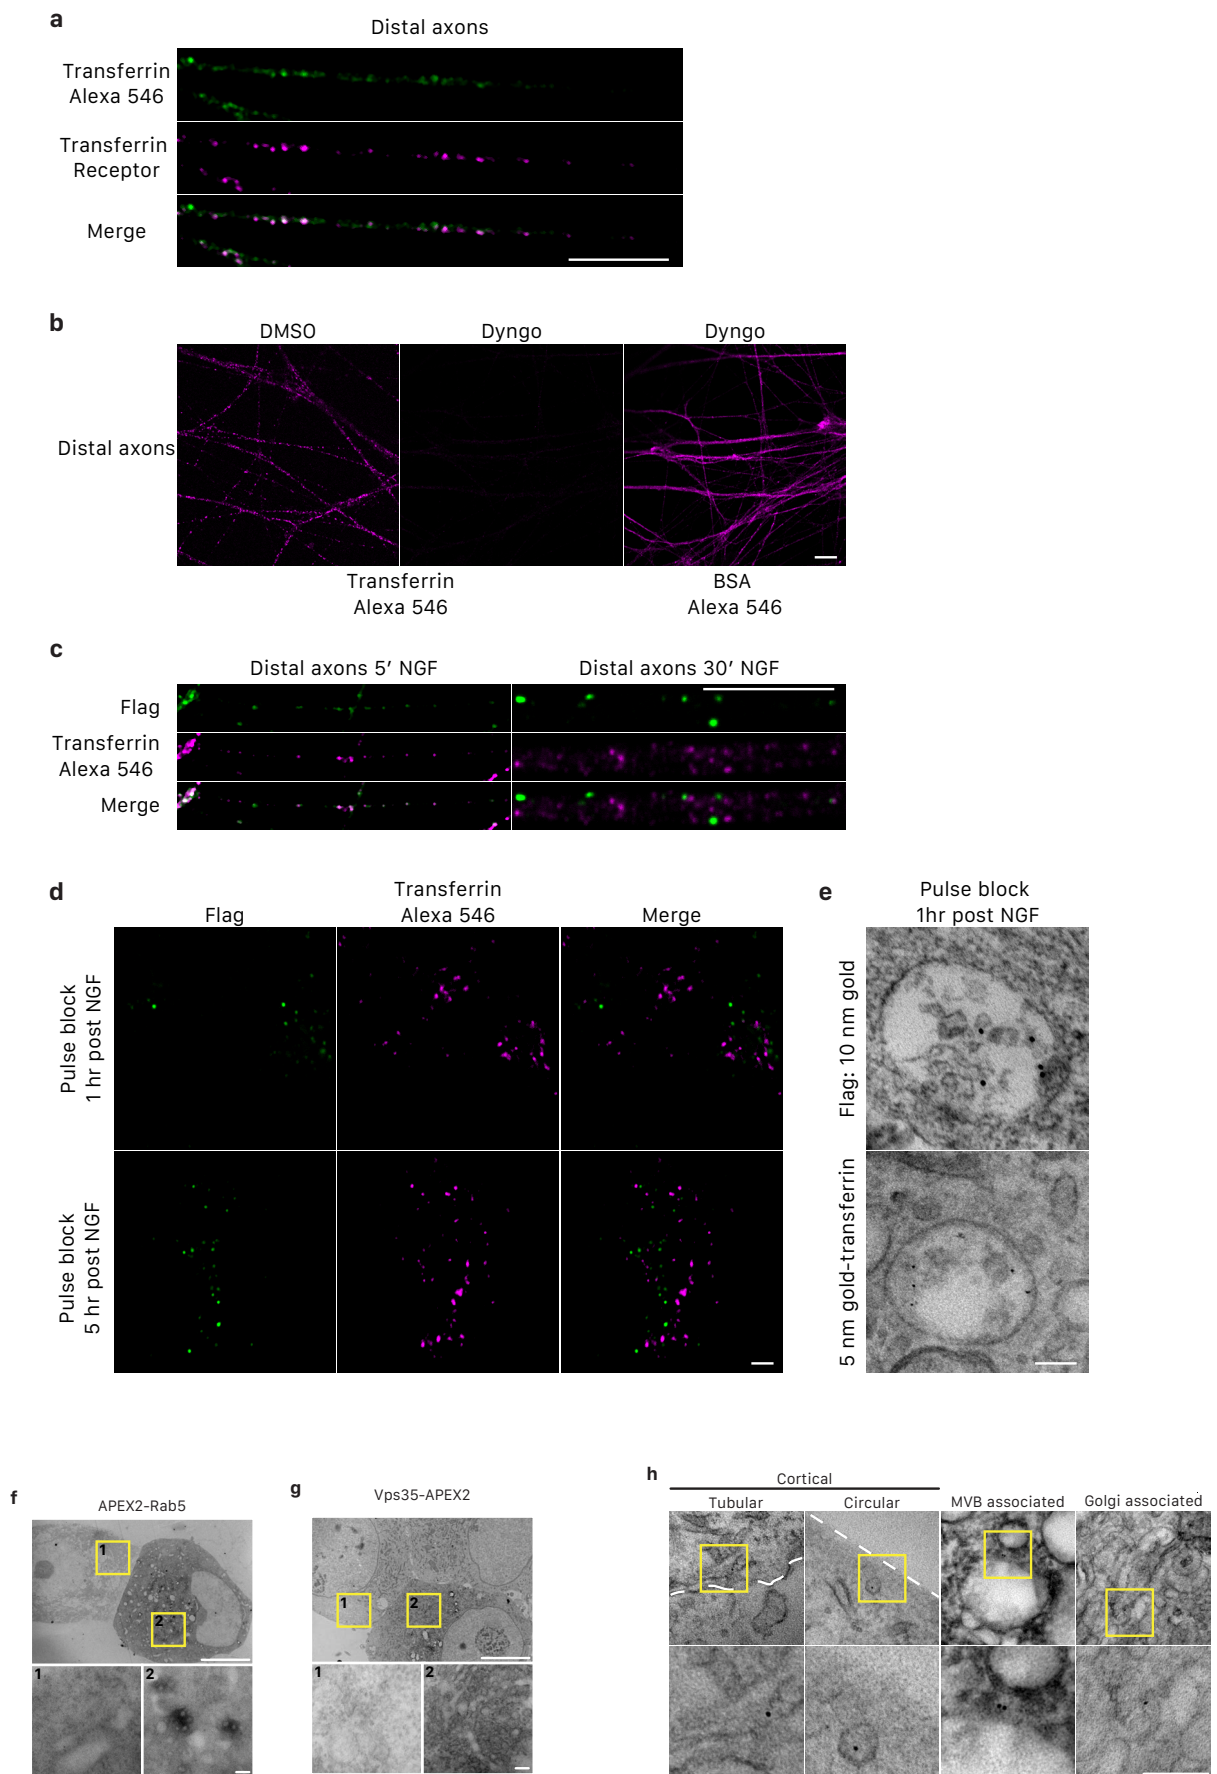

Figure 6-figure supplement 1

Supplement: supp [file elife-33012-supp-v1.zip › elife_poa_e33012_Figure_6_figure_supplement_1.pdf]

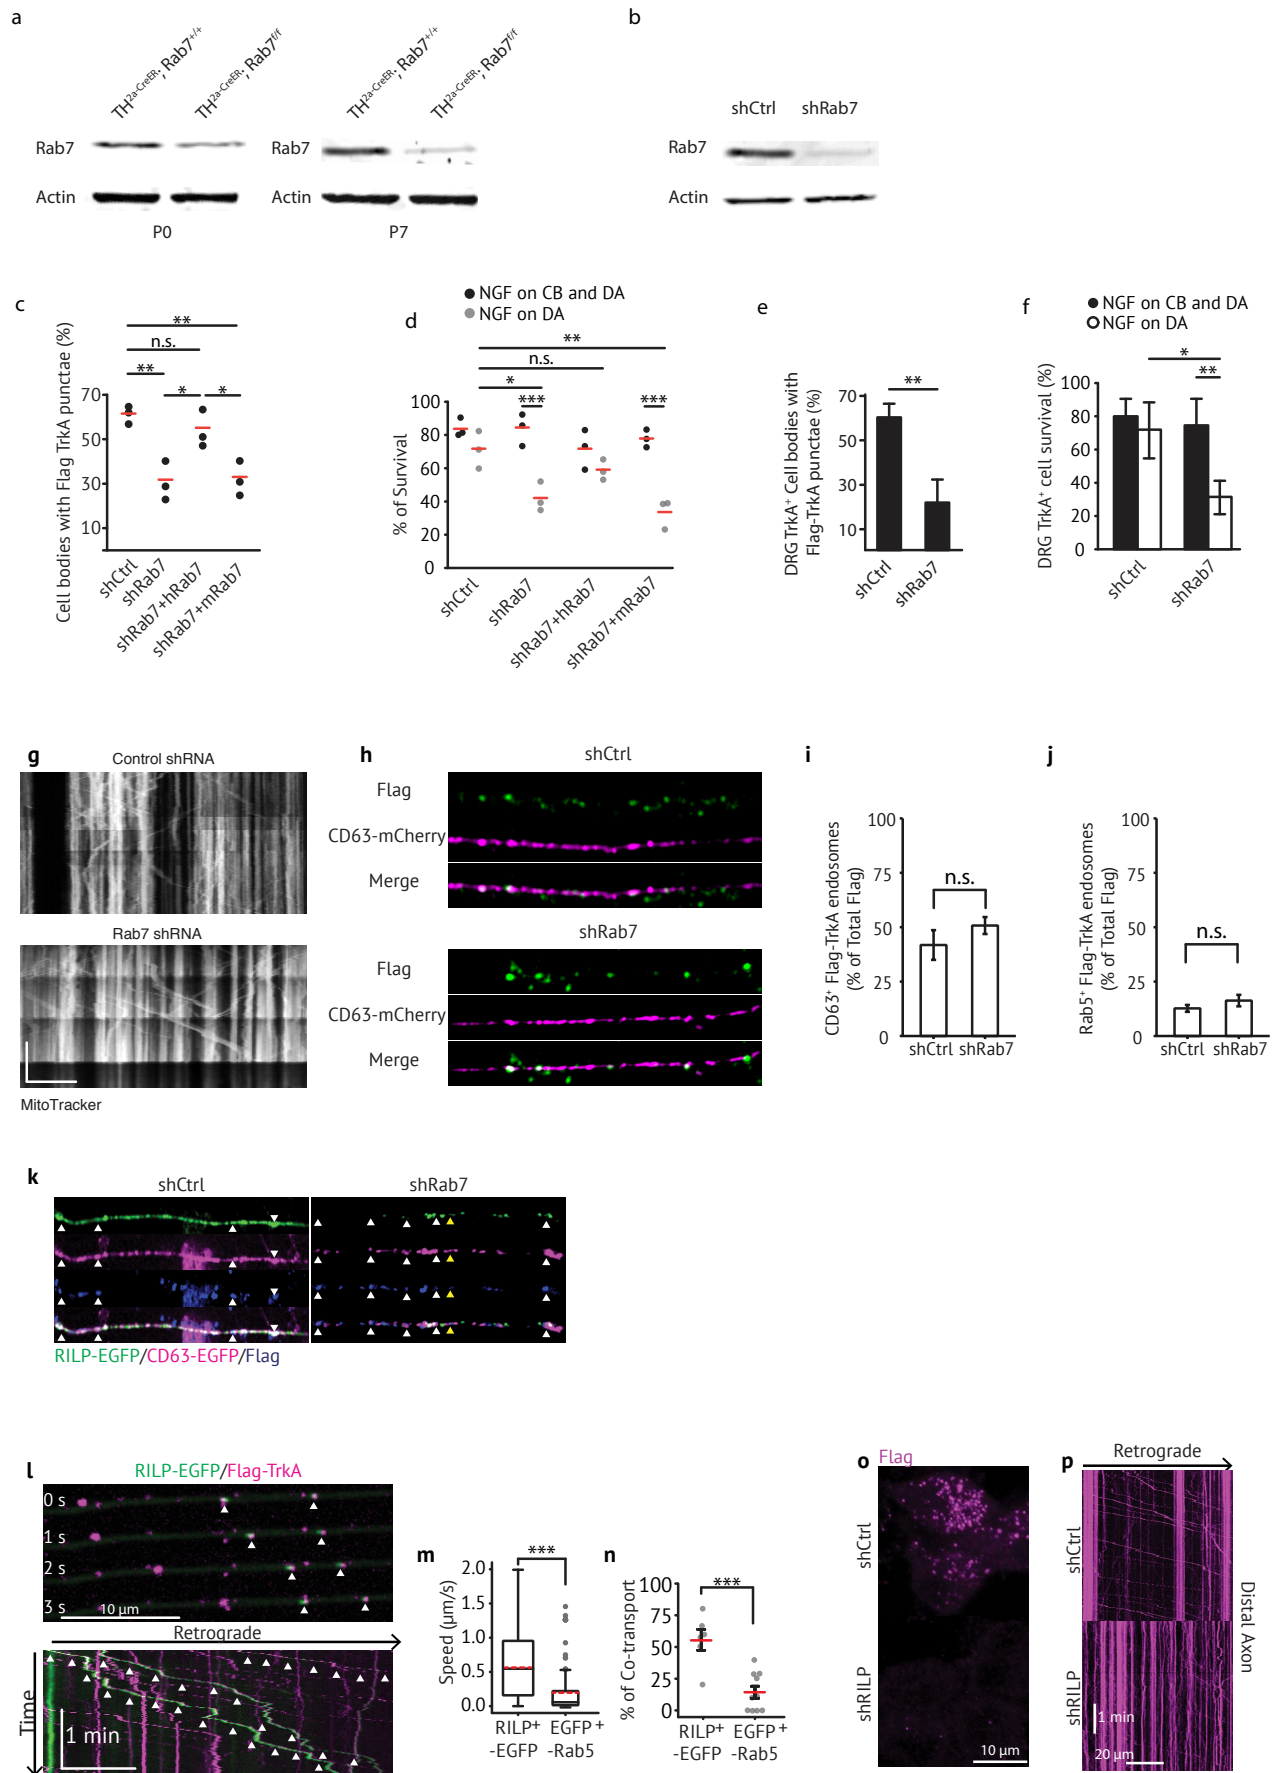

Figure 3-figure supplement 1

Supplement: supp [file elife-33012-supp-v1.zip › elife_poa_e33012_Figure_3_figure_supplement_1.pdf]
